# Supplementary material
Source: Springer Nature journal article supplement (https://www.springermedizin.de/resource/supplementary/12936_2014_3166_MOESM8_ESM.pdf/9545264)

Astemizole

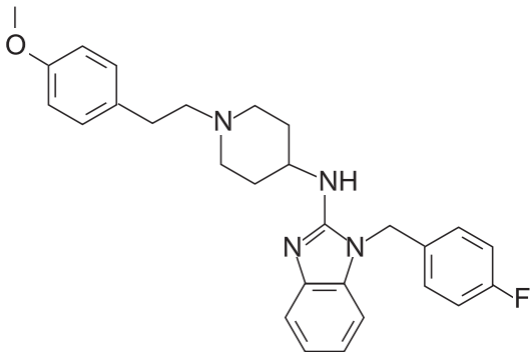

Chloroquine

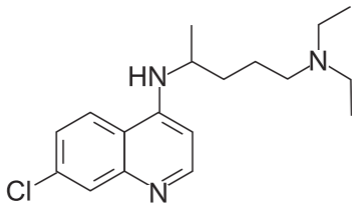

Supplement: MOESM8 [file 9545264]
